# Supplementary material for: Discovery of recurrent structural variants in nasopharyngeal carcinoma
Source: HighWire-hosted journal article supplement (doi:10.1101/gr.156224.113), 2013-11-08
Supplement: Supp_Material_NPC.docx [file Supp_Material_NPC.docx]

**Detailed description of the SMASH somatic structural variant detection method.**

**Problem.** SMASH detects coordinates of somatic structural breakpoints based on large-insert mate-pair sequencing data.

**Input data.** Two SAM alignment files representing read1 and read2 alignments from the tumor sample. Two SAM alignment files representing read1 and read2 alignments from the matched normal sample (such as blood or healthy skin).

**Output.** A set of somatic structural breakpoints, resulting from acquired structural genomic variants. Each breakpoint is given by two genomic coordinates and their relative orientation describing which regions are joined as a result of somatic variant.

**Example:**

>Cluster 526

# PE-reads: 184 (tumor data mate-pairs)

# Normal_pairs: 0

# cor: 0.887785 (correlation metric)

# PE-read fraction with consistent insert size: 1

# PE-read fraction with consistent dist to bp1: 1

# PE-read fraction with consistent dist to bp2: 1

# range1: chr2 66293664 66298242 + 4578

# range2: chr2 66324118 66328344 + 4226

# range_mean1: 66296615

# range_mean2: 66325886

# range_median1: 66296852

# range_median2: 66325884

# link1: chr2: 66293664-66298242

# link2: chr2: 66324118-66328344

# bp1: chr2 66298242 +

# bp2: chr2 66324118 +

# bp1_stdev: 70

# bp2_stdev: 70

# af: 0.286604

# link: chr2: 66298242-66324118

# BP_dist: 25876

# variant_mean: 25806

# variant_stdev: 38

# variant_median: 25734

MP MONK:1:2206:2352:136120# chr2 66293664 - chr2 66324308 + 3465,956,-+ O: 4768

MP MONK:2:1206:1292:51797# chr2 66294260 - chr2 66324260 + 3465,956,-+ O: 4124

MP MONK:4:2106:17552:195274# chr2 66294385 - chr2 66324817 + 3465,956,-+ O: 4556

MP MONK:4:1307:18555:16024# chr2 66294385 - chr2 66324817 + 3465,956,-+ O: 4556

MP MONK:4:1101:1996:54307# chr2 66294427 - chr2 66324256 + 3465,956,-+ O: 3953

MP MONK:2:2201:15456:23608# chr2 66294427 - chr2 66324256 + 3465,956,-+ O: 3953

**Definitions.**

**Breakpoint.** A breakpoint represents joining of exactly two genomic regions that are (typically) disjoint in the reference genome. represent two oriented genomic coordinates corresponding to regions joined as a result of a structural variant:

and

The orientations of the regions provide topological direction in which the breakpoint can be traversed to obtain infer the rearranged allele. For example, if and it means that the rearranged allele contains a segment with coordinates which is joined at to the second region at , and the rearranged allele contains a segment with coordinates .

**Mate-pair reads.**

Each mate-pair read is given by two coordinates

, representing the alignment coordinates of the two ends of the library insert. Typically the smaller coordinate of the alignment is used to represent a position of that alignment.

**Bundle mate-pair reads.**

A set of mate-pair reads are said to be a bundle of mate-pair reads representing a breakpoint , if each such mate-pair read is consistent with the breakpoint allele and the coordinates of the mate-pair alignments are consistent with inserts containing that breakpoint. In other words, one end of the mate-pair maps to the first region of the breakpoint, and the other end of the mate-par maps to the second region of the breakpoint. The size of the mate-pair insert as inferred from the breakpoint is within the expected library insert distribution. The orientation of mate-pair mappings is consistent with the library orientation structure.

**Description of the method.**

**Step 1. Identification of all structural variants in the tumor sample.**

During this step SMASH identifies breakpoints by analyzing only the mate-pairs from the tumor data. The resulting breakpoints represent both somatic and germline rearrangements. SMASH performs the following steps to obtain this result:

**(a)** Data de-duplication.

During library sequencing some of the mate-pair inserts may be sequenced more than once, resulting in duplicate data. Duplicate reads cause substantial difficulties for identification of true structural variants. In particular, a single spurious discordant mate-pair appearing multiple times in the sequence data falsely indicates multiple measurements supporting the rearrangement, potentially producing a false-positive SV call.

To perform de-duplication, the reads are first sorted according to their leftmost genomic coordinate. Then all the reads are considered starting from the first, and compared to the reads that have alignments within a certain short distance (10 bps). The read is marked as duplicate if the following conditions are met:

- the begin coordinate of read1 is the same as the begin coordinate of read1 of another mate-pair

or

- the end coordinate of read1 is the same as the end coordinate of read1 of another mate-pair

and

- the begin coordinate of read2 is the same as the begin coordinate of read2 of another mate-pair

or

- the end coordinate of read2 is the same as the end coordinate of read2 of another mate-pair

All duplicates are collapsed to a single instance of that duplicate insert, and the duplicate reads are not considered further.

**(b)** Empirical assessment of the library length distribution and read orientation.

SMASH performs sampling of a certain number (1 million by default) of mate-pair reads and records their relative orientations. There are several potential combinations such as ++/-- (two reads both mapping in the same orientation), +- (two reads facing inwards, typical for standard paired-end Illumina sequencing), or -+ (two reads facing outwards, which is an orientation produced by our modified protocol which we used to sequence NPC5989). For each of the three orientation types, we record the number of the read-pairs falling into that category, and the distribution parameters of the distances between the two ends (median, mean, and standard deviation) falling within a certain maximum distance of each other (same chromosome, distance not exceeding 40 Kb). The category containing the majority of the read pairs provides the relative orientation of the reads in the sequencing library and the length parameters of the library inserts (mean, median and standard deviation of insert lengths).

**(c)** Detection of discordant read-pairs.

Only discordant reads (i.e. not conforming to the empirical insert distribution) support the presence of the breakpoint alleles. Discordant reads are identified based on the empirical distribution of insert structure determined in the previous steps. Specifically, discordant reads are defined as either (a) having both ends mapping on different chromosomes or (b) having both ends map on the same chromosome, but in relative orientation inconsistent with the library structure, or (c) having both ends map on the same chromosome, in the correct relative orientation, but with the distance between the two ends falling outside of the library insert range , estimated empirically in the previous step. All discordant mate-pairs defined this way are retained, while the rest of the mate-pairs are not considered until later steps.

**(d)** Identification of bundles of discordant mate-pairs.

In the process of construction of the mate-pair libraries, the genomic inserts are circularized via ligation. This process results in a creation of a certain fraction of “chimeric circles” in which more than one genomic insert is joined into a circle. This leads to sometimes a significant proportion of mate-pairs (10-15% of the entire data) representing chimeric constructs. Such constructs do not reveal true structural variants, but rather represent unwanted background noise. Such background noise is “uniform” in a sense that such chimeric reads are not expected to cluster. By contrast, the reads supporting truly rearranged alleles are manifested by many independent mate-pair reads clustering within the sites of rearrangements. To distinguish “background noise” from true structural variants, we perform “clustering” of the discordant read pairs to identify two or more mate-pair reads which have similar mapping orientation and have both left and right ends clustering within short distance for all the mate-pair reads within the bundle.

To identify such bundles, we first sort all mate-pairs according to their leftmost genomic coordinates. Then all the mate-pair reads are considered in increasing order of their genomic coordinates. If two mate-pair reads have their leftmost reads map to the same chromosome and within a certain distance (2 Kb by default) and have the same orientation, then their right ends are also checked. If their right ends map to the same chromosome, with the same orientation, and within a defined distance (2 Kb by default), then the two are “bundled” together. Mate-pair reads are added to existing bundles as long as the same criterion applies to at least one read within that bundle.

**(e)** Estimation of breakpoint coordinates

Once the bundles are identified, we use a threshold on the number of reads (bundle thickness) to determine which bundles have “significant support”. By default, we select bundles with four or more independent non-duplicate mate-pair reads within the bundle.

Selected bundles represent candidate rearrangement alleles within the tumor sample. The first bundle region is represented by the first matching set of coordinates of mate-pairs within that bundle:

where

and .

Similarly, the second end of the bundle is represented by another set of mate-pair coordinates

where

and

SMASH estimates coordinates of breakpoints via two different methods. The first is the boundary method, which is based on identifying the read coordinate that is the closest to the breakpoint. For instance, for the mate-pair library with library structure +-, and a breakpoint with coordinates and , the first breakpoint coordinate is defined as

, (flip switches + to –, and – to +)

and if ( represents the start position of every read alignment),

or if ( represents the end position of every read alignment)

Similarly, the coordinate of the second region of the breakpoint is estimated as

,

and if ( represents the end position of every read alignment)

or if ( represents the start position of every read alignment).

The second method for the estimation of the breakpoint coordinate is called a mean-based estimator. Specifically, the first breakpoint coordinate is estimated using the formula:

if and

if .

Similarly,

if and

if

Here and are defined as the terminal positions of the mate-pair alignment, that is the “leftmost” alignment coordinate of the leftmost mapping read and the rightmost alignment coordinate of the rightmost mapping read. Also, is the mean library size defined as the mean distance between the terminal positions of concordant mate-pairs.

These formulas also allow approximating the accuracy of the breakpoint estimate:

and .

Based on the two estimates and , SMASH chooses for its final estimate, unless it contradicts :

If : , if , otherwise .

If : , if , otherwise .

**(f)** Assessment of breakpoint quality and removal of false positive calls.

Due to extensive repeat structure of the human genome, many discordantly mapping mate-pair reads are due to these repeat features, rather than due to true genomic structural rearrangements. To minimize the number of such false positives, we calculate quality metrics for the reported breakpoints and use those quality measures to filter out false positive breakpoint calls.

The first quality metric is a read coordinate correlation. This metric measures the consistency of mapping positions from both ends of mate-pairs representing a given breakpoint. The correlation metric is calculated using the following formula , where and represent vectors of alignment cooridinates of mate-pair reads from the first and the second regions of the breakpoint respectively.

Based on our analysis, we found that is a good criterion for determining a ‘quality’ breakpoint, if and when . Breakpoints that don’t meet this criterion are marked as potential false positives.

Another breakpoint quality measure is the size of the footprint of bundle reads. Specifically, if represent coordinates of bundle reads mapping to one region of the breakpoint, then the footprint size is given by the formula . Typically the two footprints of the bundle reads should exceed the average size of the library insert. In many cases of false positive breakpoints, we observe that at least one footprint is very small. Therefore we eliminate breakpoints which have at least 4 mate pairs and at least one footprint .

Another quality measure of the breakpoint is based on estimates of the sizes of the bundle inserts inferred from the breakpoint coordinates. Specifically, for a mate-pair read defined via its coordinates representing a breakpoint with inferred coordinates , the inferred size of the insert (except for the short insertion) is . If falls outside a range of , inferred empirically from the data, that mate-pair read is marked as inconsistent with the breakpoint.

Similarly, the end-coordinate of the mate-pair read may not map too far away from the boundary. That is if falls further than from the breakpoint boundary, that read is marked as inconsistent with the breakpoint.

SMASH uses a threshold of 20% or more of inconsistent bundle reads to mark the breakpoint as a false positive. The high threshold (20%) compensates for errors in the breakpoint estimation.

We observed that false positive breakpoints frequently have significant sequence homology at the regions flanking the breakpoints. This phenomenon is either due to extensive repeat and homology structure of the human genome, or due to incorrectly assembled regions of the human genome. Because such regions were frequently giving us false positive breakpoint calls, we decided to implement a filter to mark potential false positive breakpoints with significant sequence homology. Specifically, for every breakpoint , we extract regions:

if or

if

and

if or

if

for some specified distance (default 3 Kb).

Then, we calculate a local Smith-Waterman alignment and between the regions. If there is significant degree of sequence homology (defined as minimum of 70% of similarity over at least 700 bp region), than the breakpoint is marked as a potential false positive breakpoint call.

**Step 2. Elimination of germline breakpoints.**

Germline breakpoints are expected to be present in both tumor and matched normal data and contain mate-pairs representing breakpoint alleles in both of these samples. To eliminate germline breakpoints, SMASH does not directly detect the breakpoints in the normal data. Rather, given a set of breakpoints inferred from the tumor tissue sample, SMASH removes breakpoints that have mate-pairs in the normal data consistent with those breakpoints. More specifically, for every tumor sample breakpoint, and every mate-pair read in the matched normal data, SMASH checks if consistency of that mate-pair can be established with any of the breakpoints. Breakpoints with support in the matched normal data are likely to be germline variants, and are eliminated from further consideration.

A mate-pair read is said to be consistent with the breakpoint if the coordinate of the first mate matches with the first region: and ; the second mate matches with the second region: and , and orientation of mates is consistent with the breakpoint. E.g. if the library has orientation structure -+ (facing outwards) and , then (similar for other cases, not shown).

The resulting list of breakpoints that passed all the quality filters, and not eliminated when compared to the normal data, makes up the final list of somatic breakpoints.

**Step 3. Split-read analysis.**

Split-read analysis represents an optional step that leads to improved accuracy of the breakpoint coordinates identifying the sequencing reads that cross the breakpoint and performing nucleotide-level read-reference comparisons. Frequently, we can identify sequencing reads for which part of the read will align to one region of the breakpoint, and the other part will align to the other region of the breakpoint, therefore “spelling out” the exact sequence of the breakpoint. Note that this may not be possible for every breakpoint, as our analysis shows that the breakpoints also contain novel sequences between the two regions that are joined.

To identify breakpoint split-reads, we split every read in the tumor data into two parts of equal length, and map them independently using an aligner of choice (we used Novoalign), allowing for “soft-clipping”. Soft-clipping allows the read to be mapped partially, by iteratively aligning after clipping off certain number of bases from the end of the read. Soft-clipping is necessary to allow partial mapping of the read across the breakpoint.

After the split-mapping of all sequencing reads, we identify discordant mappings, for which the two parts map to different genomic sites. All such discordantly mapping reads are then compared to somatic breakpoints. If a discordantly mapping split-read is consistent with the somatic breakpoint, the coordinate of the breakpoint can be refined using the soft-clipping boundary of the supporting reads.

**Differences between SMASH and other published SV-detection methods that use mate-pair discordance.**

To limit discussion to the appropriate scope, we will not here address the basic differences between algorithms that use mate pairs and those that do not. The two most relevant published tools that also utilize mate-pair discordance that we are aware of at the time of writing are DELLY (Rausch et al. 2012) and HYDRA (Quinlan et al. 2010). Both are general SV callers not specifically designed for detection of somatic breakpoints.

The primary method of detecting breakpoints in the tumor sample in SMASH is somewhat similar to DELLY's (Rausch et al 2012) in that it combines the use of discordant mate-pairs and split-reads to produce the initial set of calls. However, SMASH is very permissive in how it detects the initial set of candidate breakpoints, and then relies on numerous filtering metrics (described in detail above) to eliminate breakpoints that have evidence of being false positives. Of particular importance are correlation metrics of breakpoint read coordinates, and measures of consistency of insert sizes with the inferred breakpoint coordinates. Furthermore, SMASH includes a read de-duplication procedure to reduce false positives, and only relies on *independent* mate-pairs supporting the same variant call.

Similar differences exist between SMASH and Hydra-SV (Quinlan et al, 2010). Although both SMASH and Hydra-SV rely initially on discordant paired-end mappings, the further processing of the discordant mate-pairs is different between the two methods. Hydra relies on breaktig sequence assembly, while SMASH does not.

Finally, as alluded to above, SMASH is distinct from these existing methods in the way it distinguishes somatic from germline breakpoints. A common approach in many cancer sequencing papers is to identify breakpoints separately in the tumor and its matched normal sample, and subtract the matched-normal breakpoints from the tumor sample breakpoints. SMASH, by contrast, does not require detection of breakpoints in the normal sample, but rather compares the normal mate-pair reads directly to the tumor-sample breakpoints. If SMASH detects even a single mate-pair read that is consistent with a breakpoint identified in the tumor sample, it removes that breakpoint from further consideration. It does so to avoid the “threshold effect” of the comparison of independently generated normal and tumor lists, whereby a chance false positive in the tumor sample is not likely to have comparable support in the normal list, such that it falls below the threshold there and is then identified as a tumor-specific breakpoint. SMASH avoids this pitfall and achieves a much lower false-positive rate as a result. We support this claim by the validation experiments and note that sensitivity is not dramatically affected, as we show by the simulations described below.

**SMASH limitations.**

SMASH has a number of limitations, the most significant of which is that certain types of variants are difficult or impossible to detect. For example, first, structural variants that do not produce breakpoints are presently not detectable with SMASH. Chromosomal truncations, for example, result in copy number changes over significant regions, but do not produce breakpoints (defined as a joining of two regions). Second, any rearrangement that includes unique genomic sequences not present within the reference genome (exceeding the library insert size), would not be detected with SMASH. This is because SMASH leverages mappings of discordant mate-pairs near the breakpoint boundaries, and the mappings themselves are performed against the reference human genome. If the unique breakpoint sequence is not present in the human genome reference, the reads cannot be mapped to that sequence. Third, SMASH relies on a single unique alignment for every sequencing read. Thus, if the aligner reports multiple matches (e.g. for the non-unique regions of the genome), such mappings will not be considered in SMASH. Similarly, if the breakpoint occurs within a long non-unique region of the human genome, such breakpoint will also be difficult to detect. Fourth, SMASH breakpoint detection is limited to fairly large structural rearrangements (such as deletions exceeding 1 Kb). So short deletions or short insertions are at present difficult to detect with SMASH. Finally, SMASH has an optional filter to remove breakpoints showing significant sequence homology (determined via Smith-Waterman alignment). We found that this filter was very useful, and allowed us to significantly reduce the rate of false positive breakpoint calls. However, it is known that many structural variants are mediated by breakpoint-adjacent short repeats. Although our homology criteria require a fairly long stretch of homologous sequence, it is nonetheless a potential concern for removing some true positive breakpoints. Thus, whenever one performs SMASH breakpoint analysis, one needs to be aware of this potential bias against breakpoints within regions showing sequence homology. In such cases one can utilize the breakpoints before the homology filter.

**Evaluation of SMASH on simulated data.**

We first evaluated performance of SMASH using simulated cancer and matched normal data. We designed a total of 35 genomic breakpoints representing different classes of structural variants: 5 deletions (1 Mb each, 5 breakpoints), 5 duplications (1 Mb each, 5 breakpoints), 5 inversions (1 Mb each, 10 breakpoints, 2 per inversion), 5 balanced translocations (10 breakpoints, 2 per balanced translocation), and 5 small insertions (2 Kb each). Based on breakpoint positions, we simulated four sets of breakpoint read pairs using 100, 50, 20 and 6 read pairs representing each breakpoint. These four coverage levels represent various frequencies of rearranged alleles in the tumor sample, corresponding to tumor content of 17%, 9%, 3.4% and 1%.

We simulated 1 billion tumor read pairs using 3.5 Kb insert size and 1 billion matched normal read pairs using 3.5 Kb insert size. To recapitulate significant frequency of chimeric reads typically occurring in the large-insert sequencing datasets, ten percent of the simulated read pairs were “chimeric”, with the ends sampled randomly from the genome. To the simulated tumor data we added either 100, 50, 20 or 6 breakpoint read pair datasets to produce a rearranged tumor dataset, and then ran SMASH analyses separately for each of the four levels of coverage. For 100, 50 and 20 breakpoint read pair datasets, we were able to correctly detect all breakpoints except for small insertions without any false positives. Small insertions are difficult to detect due to the fact that SMASH aggressively eliminates breakpoints that are supported by any normal read pairs, and with the default settings, read pairs consistent with small insertions are typically found in datasets with deep physical coverage. For the detected 30 somatic breakpoints, the average accuracy of the breakpoint coordinate was 32 bps, 65 bps, and 140 bps for the 100, 50 and 20 breakpoint read pair datasets respectively (Supplementary table T3).

At the lowest level of coverage of 6 breakpoint read pairs (which is the default minimal breakpoint detection threshold), we were able to identify 1 in 5 deletions, 4 out of 5 duplications, 9 out of 10 inversion breakpoints, 8 out of 10 balanced translocation breakpoints, no small insertions, and no false positive breakpoints. In this case the average accuracy of the breakpoint coordinate was 481 bps (Supplementary table T3). These results demonstrate a good accuracy of breakpoint detection by SMASH and also illustrate the limitations of the method with the respect to small insertions and breakpoints supported by too few read pairs.

An important caveat to the simulations described above is that we simulated SAM alignments, rather than sampled the sequence reads from the regions adjacent to the breakpoints. Therefore, such simple analysis also does not account for potential issues related to read mapping, and does not capture distribution of structural variants across the genome, their association with repeats and other biological features of human structural variants. To address this concern, we randomly selected 10 structural variants from the human structural variation resource (Kidd JM et al., 2010).

Kidd JM, Graves T, Newman TL, Fulton R, Hayden HS, Malig M, Kallicki J, Kaul R, Wilson RK, Eichler EE. “A human genome structural variation sequencing resource reveals insights into mutational mechanisms.” *Cell* (2010)

Variant Type Gene Name Variant ID chrm begin end Variant Size

Deletion1 GSTM1 AC193092 chr1 110027144 110046508 19365

Deletion2 CR1 AC193095 chr1 205785380 205804281 18902

Deletion3 DMBT1 AC193126 chr10 124352774 124368514 15741

Deletion4 TRIM48 AC216084 chr11 54788176 54795120 6945

Deletion5 FLJ40296 AC213241 chr13 56611299 56648477 37179

Deletion6 ACOT1 AC213260 chr14 73066715 73094735 28021

Deletion7 CDR2 AC226589 chr16 21698841 22516100 817260

Deletion8 SULT1A3 AC212295 chr16 29357728 29464030 106303

Deletion9 KRTAP9-9 AC213246 chr17 36636797 36649081 12285

Deletion10 LILRA6 AC153469 chr19 59419084 59439890 20807

For each deletion, we generated 100, 50, 20 and 6 mate-pair sequencing reads by sampling sequences from the breakpoint regions using the same insert library distribution as in NPC5989 sample. For each simulated sequence dataset, we mapped the reads using Novocraft Novoalign and the same mapping parameters as for NPC5989 datasets. We combined the mappings with 1 million mate-pair mappings sampled randomly across the genome, and detected breakpoints using SMASH (Supplementary Table T4).

In the 100-pair dataset we identified 4 out of 10 breakpoints with default SMASH parameters. A detailed examination of the read mappings revealed that SAM alignments to the remaining 6 regions contained a large number of reads with low mapq scores. The default SMASH analysis implements a mapq cutoff of 90 for the read alignments from the tumor sample and a mapq score threshold of 30 for the matched normal sample. To ask whether we could increase sensitivity we lowered the mapq thresholds to 20 for both tumor and normal mate-pair datasets and repeated the analysis. We were able to detect 8/10 breakpoints with the number of mate-pairs supporting a breakpoint ranging from 12 to 100. We further examined why we were not able to detect Deletion2 and Deletion7, and observed that there were only 5 and 2 out of 100 mate-pair reads corresponding to those breakpoints that had both of their ends mapped. SMASH's default threshold is 6 or more mate-pairs supporting any given breakpoint, which was too high to detect Deletion2 and Deletion7. Therefore, we conclude that we were not able to detect those two deletions because of non-unique regions surrounding the breakpoint that affected Novocraft’s ability to align sequences to these regions. Furthermore, we observed that at least four other breakpoints (Deletion1, Deletion3, Deletion6 and Deletion10) were marked as potential false positives due to extensive sequence similarity at the breakpoint junction (homologous regions ranged from 776 bps (91% identity) to 3861 (94% identity).

For the 50-mate-pair dataset, we detected 4/10 breakpoints with 90/30 mapq thresholds and 7/10 breakpoints using 20/20 mapq thresholds. All 7 breakpoints were also found in 100-mate-pair dataset. The additional missing breakpoint Deletion8 represented a barely detectable allele with 6 supporting mate-pairs in the 100-mate-pair dataset.

For the 20-mate-pair dataset, we detected 2/10 breakpoints with 90/30 mapq thresholds and 6/10 breakpoints with 20/20 tmapq thresholds. For the 6-mate-pair dataset, we detected 1/10 breakpoints for the 90/30 mapq thresholds and 3/10 with 20/20 mapq thresholds.

Thus, we conclude that SMASH is able to accurately and reliably detect previously characterized deletions present in human population, with the exception of variants occurring in non-unique regions. Within such non-unique regions the breakpoints are recoverable with lowered mapq thresholds, except for regions where it is not possible to place reads unambiguously (2/10 analyzed breakpoints). An important caveat to using lowered mapq thresholds is that it may result in an increased number of false positive calls.

**Comparison with Hydra**

We compared the output of SMASH to Hydra (Quinlan et al., 2010) on the same set of simulated breakpoints (Supplemental Table T3) consisting of 5 deletions (5 breakpoints), 5 duplications (5 breakpoints), 5 inversions (10 breakpoints), 5 translocations (10 breakpoints) and 5 short insertions (5 breakpoints). As with SMASH, we used a 6 mate-pair threshold as the minimal number of discordant mate-pairs representing a breakpoint. Overall, Hydra showed similar levels of breakpoint detection to SMASH (Supplemental Table T3) except for insertions, for which Hydra showed a higher rate of detection. SMASH however had higher accuracy in the actual coordinate of the breakpoint. Further comparisons of SMASH with somatic structural variant callers (such as Hydra MULTI, Malhotra et al., 2013; Delly, Rausch et al., 2012) were not possible because they were not available at the time of finalizing our manuscript.

**Coverage-based analysis of tumor content.**

We estimated the tumor content in Fig. 2 using the following approach. Suppose represents the fraction of tumor cells in the sample and is the average coverage per site. If one copy of a region of length is lost in the tumor cells, then the associated coverage for that region in the sample is the sum of the coverage contributed by the normal cells and the coverage contributed by the tumor cells , which can be simplified to . The coverage for the same region in the normal sample is , where is the average normal sample coverage. Thus, the ratio of tumor to normal coverage can be expressed as:

In our data and observed ratio is , which gives , providing an estimate for .

Similarly, when a copy of a region is gained, the observed tumor sample coverage can be written as , providing and estimate for alpha .

Note that for simplicity we did not account for the fact that the losses and gains will result in the coverage redistribution across the entire genome rather than just for the affected region. It is reasonable to do so in this case because the size of the translocation is reasonably small compared to the size of the entire genome (3%).

**SMASH FDR estimation.** To estimate the FDR, we interchanged tumor and normal samples using NPC-5989 data, and ran the structural variant analysis. Although a few breakpoints were detected in the initial step based solely on the presence of read pair bundles, the downstream quality filters that consider distribution of read coordinates successfully eliminated them, effectively resulting in a zero false positive rate.

**FISH validation.** One of the goals of our analysis was to validate structural variants predicted by SMASH using FISH in NPC5989. First, we were able to unambiguously confirm all breakpoints using Sanger sequencing from primary tissue DNA.

FISH probes were placed to flank the fusion genes detected by SMASH, and were expected to “break apart” (i.e. result in separated or unpaired green/red dots) whenever the sample contained a rearranged copy of the interrogated gene.

We also performed FISH on the test case NPC-5989 to evaluate the status of MAML2 as well as evaluate duplicative translocation chr1-chr8 and 0.6 Mb deletion on the chr1 (Fig. 3). However, FISH results did not indicate that those regions were rearranged. This was somewhat anticipated for the MAML2 because this variant was part of a 6 Mb coupled inversion (Fig. 3b) which is right at the detection limit of FISH. To investigate the absence of duplicative translocation and deletion in the FFPE tissue, we performed PCR using FFPE extracted DNA on 10 breakpoints discovered by SMASH. Only 4 primer pairs produced specific PCR bands, indicating that while the tissue shared similarity with NPC-5989 primary tissue DNA, it was at the same time missing a number of structural variants (including a duplicative translocation and 0.6 Mb deletion on chr1). This most likely means that FFPE block contained a part of NPC tissue with less advanced tumor clone.

From the FISH TMA analysis, we observed the following details for the tissues containing rearrangements:

NPC-22508 (PTK2 rearrangement) – metastasis, primary tissue does not contain rearrangement for PTK2

NPC-22476 (PTK2 rearrangement) – metastasis, primary tissue not available

NPC-23058 (23452) (PTK2 rearrangement) – Chinese NPC TA-356, no clinical annotation

NPC-23048 (22796) (PTK2 rearrangement) – Chinese NPC TA-356, no clinical annotation

NPC-23067 (25644) (PTK2 rearrangement) – Chinese NPC TA-356, no clinical annotation

NPC-23105 (27793) (PTK2 rearrangement) – Chinese NPC TA-356, no clinical annotation

NPC-22480 (test case) (SP3 rearrangement) – recurrent, primary tissue does not contain rearrangement for SP3

NPC-19745 (SP3 rearrangement) – recurrent, primary tissue does not contain rearrangement for SP3

NPC-23067 (25644) (SP3 rearrangement) – Chinese NPC TA-356, no clinical annotation

NPC-22525 (MAML2 rearrangement) – metastasis, primary tissue does not contain rearrangement for MAML2

NPC-23067 (MAML2 rearrangement) – Chinese NPC TA-356, no clinical annotation

NPC-19743 (MAML2 rearrangement) – Chinese NPC TA-356, no clinical annotation

**Tumor EBV load assessment**

To estimate the number of EBV genome copies per cell, we compared the number of reads mapped to the human genome to the number of reads mapped to the EBV genome. From the raw data (before any deduplication), 807 million reads from one end and 761 million reads from another end mapped to human hg19 reference, providing an average frequency of (807+761)/(2*3096)=0.25 read starts corresponding to any given position of either of the two alleles in the human genome. There were 2.4 and 2.3 million reads mapping to EBV genome, corresponding to 4.7/0.174=27 read starts per EBV genome position. Therefore, for one set of human chromosomes in the cells, we estimate to have 27/0.25=108 copies of EBV genomes. One important caveat is that we do not correct for the tumor content, so potentially this number can be even higher per tumor cell.

**Read mapping.**

We mapped both tumor and matched normal sequencing data using a 12-node cloud cluster configured on the IBM SmartCloud platform. For the cost/benefit analysis we assessed that all costs associated with read mapping using Novocraft read mapping tool amounted to $891 for the entire tumor and normal data, and took approximately 90 hours.

**Cost analysis of IBM Smarcloud.**

Costs associated with the use of cloud computing resources are a combination of instance-hours (usage of compute nodes), usage of persistent storage, and upload / download traffic. Uploading the entire data took (for both tumor and normal) 4.45 hours for 251 Gb resulting in a total cost of $27.61. Files were unpacked and segmented for alignment in cluster environment and mapped using Novocraft (See methods for parameters). The mapping step took 39 hours and 35 hours for the tumor and normal genomes, and costs associated with storage allocation and node usage amounted to $801 (Supplementary Table T2). All the subsequent structural variant analysis and point mutation analyses were carried out on the local server.


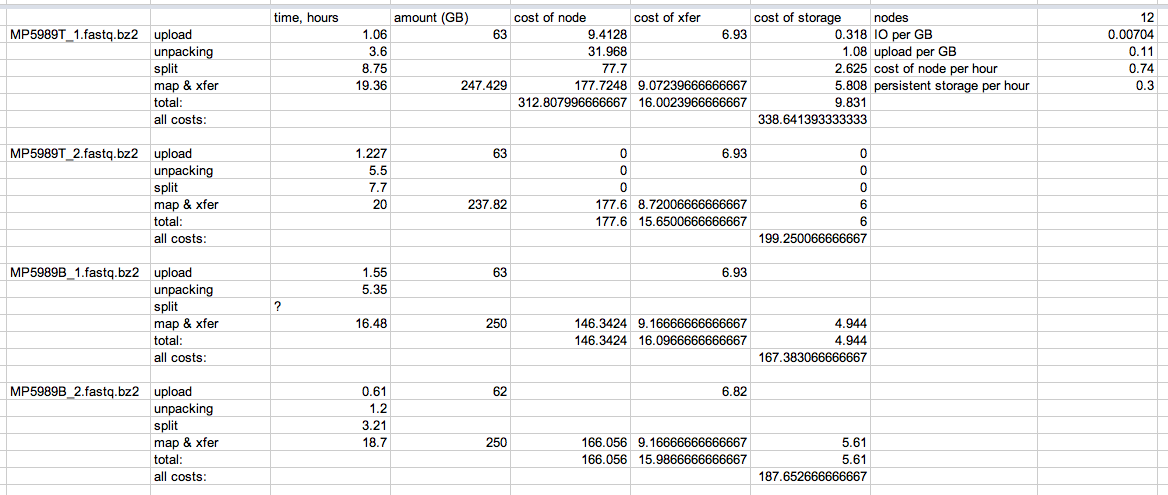


Supplementary table T2. Costs associated with data processing on IBM Smartcloud

**Analysis of the rearrangement mechanisms at the coupled inversion sites**

To investigate whether sequence homology is involved in the coupled inversion breakpoints, we have compared sequences around the breakpoints.

Coupled inversion on chr11 was represented by three breakpoints:

SV5:


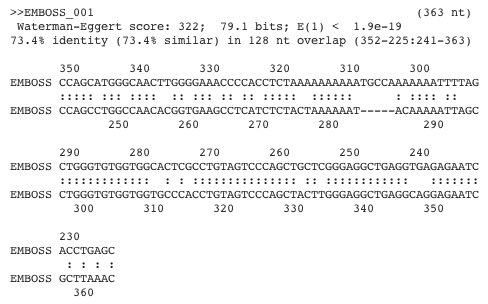


SV6:


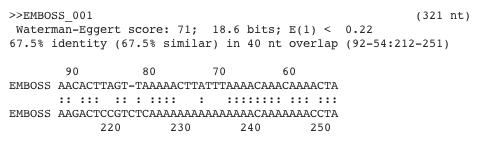


SV7:


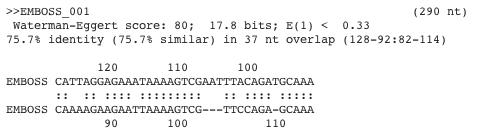


The coupled inversion on chr1 is represented by three breakpoints:

SV2:


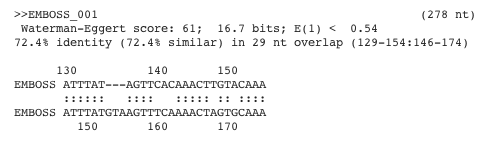


SV3:


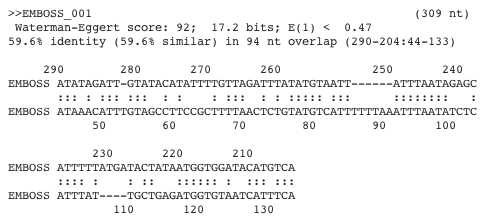


SV8:


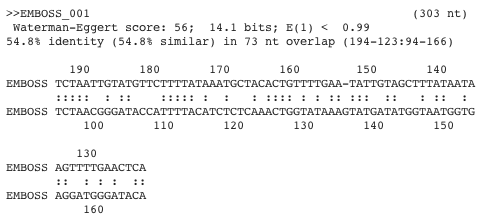


Based on these results, it appears that only SV5 has evidence of sequence homology.

**Detailed analysis of tumor content in the NPC-5989 sample.**

From our analysis of copy-number changes in NPC-5989 corresponding to chr1-chr8 duplicative translocation (Fig. 2a), we estimated that about 56-64% of cells in the analyzed tissue carried the translocation. Based on the number of the discordant mate-pairs, we estimated that 70% of cells carried duplicative translocation (which is consistent with 56-64% estimate), 53% of cells carried coupled inversion on chr11 and 56% of cells carried coupled inversion on chr1. We recorded these estimates for all breakpoints in Fig. S5.

To analyze whether these estimates were accurate, we attempted to obtain tumor content estimates using two independent approaches. The first approach was based on breakpoint-PCR and quantification of PCR bands on the agarose gel (Fig. S5, Fig. S6, Supp. Table 5), the second approach was based on the breakpoint-qPCR and CT-values (Fig. S5, Supp. Table 6).

For the breakpoint-PCR and gel quantification, we designed two primers for each breakpoint to produce a specific breakpoint PCR product. Additionally, each breakpoint primer was also paired with the control primer (primer design outlined in Fig. S6). The resulting four primers were used for competitive PCR. The resulting PCR product from each breakpoint-PCR reaction was run on the gel, and breakpoint and control band intensities were measured using fluorescent densitometer (gel pictures are given in Fig. S6). After adjusting for the molecular weight differences between the amplicons (Supp. Table 5), we were able to infer relative amounts of molecules corresponding to breakpoint or control PCR products (Supp. Table 5). Based on these amounts we were able to assess the tumor content (Fig. S5).

For the breakpoint-qPCR, we used separately in each reaction either breakpoint primers or control region primers. Three replicates were performed for each reaction with very consistent results (Supp. Table 6). Based on CT-values from qPCR, we were able to detect the relative amounts of breakpoint alleles and control alleles, which we then used to estimate tumor content.

We summarized all available estimates in Fig. S5. It appears that gel-based estimates and qPCR-based estimates are not consistent with each other and with estimates from the sequencing data. We believe that there may be several reasons for this. (1) There are differences in amplification efficiencies for amplicons, which cannot be controlled for. (2) PCR products amplify exponentially, leading to exponential increase in variance, and significant variation in estimates.

These two experiments demonstrate that the PCR-based methods are not well-suited for estimating the tumor content. Although there are other alternatives to these methods, such as digital PCR and the Nanostring, they may be also prone to similar, and perhaps other types of errors.

**Discussion of costs and benefits of large-insert mate-pair sequencing**

We can only accurately assess the costs associated with sequencing of NPC5989, since the NPC5421 sequencing was performed on the alpha SOLiD instrument for which we do not have an accurate cost assessment.

We generated an excess of 1 billion mate-pairs (before the alignment), which is typically equivalent to 5-6 HiSeq lanes for tumor and similar number for the matched normal sample using 2x101 bp protocol. This is equivalent to 12 x $2,100=$28,200 in sequencing cost, based on what the Stanford Center for Genomics and Personalized Medicine Sequencing Center charges per lane. The cost of library construction is difficult to assess, but conservatively it takes several days of a skilled molecular biologist to prepare a few libraries in parallel. Although these costs are high, we believe that such analyses will become increasingly more common as the cost of sequencing will decline further and more streamlined and simpler protocols for mate-pair libraries become available.

Nonetheless, our study demonstrates that it is technically feasible to perform detailed mate-pair SV analysis using a single mate-pair library from each sample. We believe that such analyses will become more common in the future, because of the many benefits of large-inserts compared to short inserts. In particular, large-inserts provide at least 10x increase in physical coverage compared to regular short-insert shotgun libraries. This is critical for boosting SV detection sensitivity. In our case, we were able to detect SSVs, which we estimate may be present within only few percent of tumor cells in the overall tumor sample. Such high sensitivity is critical for being able to study “difficult” heterogeneous tumor samples, or analyze tumors at the very early stage, when only a tiny portion of the tissue represents malignancy.

Furthermore, the large inserts span significantly larger regions compared to paired-end reads from the short-insert libraries. This makes it possible to map mate-pairs from rearranged alleles further away from the breakpoints (3-5 Kb), well beyond the difficult repeat regions that are often present in the immediate vicinity of the breakpoint junctions.

**References**

1. Robinson, J.T., Thorvaldsdóttir, H., Winckler, W., Guttman, G., Lander, E.S., Getz, G., Mesirov, J.P., “Integrative Geneomics Viewer.” Nat Biotech, 29, 24-26 (2011)
2. Malhotra A, Lindberg M, Faust GG, Leibowitz ML, Clark RA, Layer RM, Quinlan AR, Hall IM. “Breakpoint profiling of 64 cancer genomes reveals numerous complex rearrangements spawned by homology-independent mechanisms.” Genome Res, 23, 762-76. (2013)

**Large Insert Mate-Paired Library Preparation for Sequencing with Illuina HiSeq**

Ziming Weng, Sidow Lab

Use LoBind tubes for all steps.

Use Qubit to accurately measure the DNA concentration.

Use high quality genomic DNA (showed as tight band at >20 kb high molecular position in agarose gel)

**1. Genomic DNA Shearing**

1. Dilute 20 µg genomic DNA of high quality with QIAGEN buffer EB to a total volume of 300 ul, centrifuge for 20 minutes at 14 kg, transfer DNA liquid to a new tube without disrupting the pellet,
2. Follow HydroShear (GeneMachines) manufacturer’s instructions to shear DNA with the Standard Shearing Assembly in two of 150 µL aliquot using the parameters below:

Volume: 150 µL

Cycle Number: 20

Speed Code: 8-14 (need to be optimized)

1. Purify the sheared DNA with Life Technology PureLink column (40 µg binding capacity). Elute DNA in 50 µL buffer E1.

**2. End Repairing the Sheared DNA**

Sheared DNA was end-repaired through blunt-ended by T4 DNA Polymerase (End Polishing Enzyme 2) and dNTPs with its 5’ to 3’ polymerase and 3’ to 5’ exonuclease activities, and 5’ phosphorylated by T4 Polynucleotide Kinase and ATP (in Polishing Enzyme 1).

1. To each tube with sheared DNA, add:

20 µL 5X End Polishing Buffer

2.5 µL 10 mM dNTP mix (Invitrogen, Cat# 18427-013)

3 µL End Polishing Enzyme 1, 10 U/ µL

8 µL End Polishing Enzyme 2, 5 U/ µL

16.5 µL ddH2O

Incubate the 100 µL reaction at room temperature for 30 minutes.

1. Purify the DAN with PrueLink column and elute DNA in 50 µL buffer E1.

**3. CAP Adapter Ligation**

CAP Adapters contain one blunt end and one 2 bp-overhand end. They were ligated to both ends of DNA by T4 DNA Ligase to generate overhand ends for efficient circulation in next step. CAP Adapters lack a 5’ phosphate in one oligo, which results in a nick on each strand after CAP Adapters.

1. To each tube containing the End-repaired DNA on ice, add:

17 µL CAP Adapter (50 µM)

40 µL 5X Ligase Buffer

10 µL T4 DNA Ligase

83 µL ddH20

Incubate the 200 µL reaction at room temperature for 30 minutes.

1. Purify the DAN with PrueLink column and elute DNA in 50 µL buffer E1.

**4. Gel Size-selection of DNA**

1. Prepare a 0.8% agarose gel in 1xTAE or 0.5xTBE buffer with large comb and load all DNA in 4 wells.
2. Size select and purify the DNA of 3-4 kb from gel with Library Quick Gel Extraction Kit. Elute DNA in 50 µL Elution Buffer.
3. Measure the DNA concentration with Qubit and calculate the total DNA amount that is going to be used for next step of circularization.

**5. DNA Circularization**

CAP Adapter-ligated DNA was circularized with a biotinylated internal adapter. A very diluted reaction was used to reduce the unwanted circularization between two DNA molecules. Use molar ratio of 3:1 for Internal Adapter: size-selected DNA

1. Calculate and add to each tube containing the DNA on ice:

X µg size-selected DNA

(X x 0.65) µL Internal Adapter (2 µM)

(X x 112) µL 5X Ligase Buffer

(X x 14) µL T4 DNA Ligase (5 U/µL)

Add ddH2O to bring the total volume to (X x 560) µL.

Incubate the reaction at room temperature for 30 minutes.

1. Purify the DAN with 4 PureLink Micro Columns (6 µg capacity). Elute DNA in 20 µL Elution Buffer per column and combine all elutes from same sample.

**6. Isolation of Circularized DNA**

1. Digest the un-circularized linear DNA with Plasmid-safe ATP-dependent DNase by mixing:

80 µL Circularized DNA

5 µL 25 mM ATP

X/3 µL Plasmid-safe DNase, 10 U/ µL

2-3 µL ddH2O

Incubate the 100 µL reaction at 37C for 45 minutes.

1. Purify the DAN with PrueLink Micro column and elute DNA in 50 µL buffer E1.
2. Quantify DNA concentration with Qubit and calculate the total amount of recovered circularized DNA. 500 ng (denoted as Y ng in next step) of circularized DNA is necessary for making a high-complexity library.

**7. Nick-translation of Circularized DNA**

Nick-translation was carried out by *E. coli* DNA Polymerase I to translate the nick into the genomic DNA region. The size of genomic DNA to be included in the library (tags) is controlled by the reaction time and temperature. The below condition was used to aim for library size of 400 bp (containing the 155 bp index sequence in the final library) to be sequenced with Illumina HiSeq run of paired-end 100 bp.

1. Mix the items below in a 0.2 mL PCR tube on ice (for 500 ng circularized DNA):

50 µL Circularized DNA

6.5 µL (Y/80) 10 mM dNTP

10 µL Nick Translation Buffer

28.5 µL ddH2O

Incubate the mixture at 5C in a pre-cooled thermocycler for 5 minutes, then add:

5 µL (Y/100) DNA Polymerase I (10 U/ µL)

Mix well by pipetting up and down and continue incubation for 14-16 minutes. Transfer the reaction immediately to a 1.5 mL tube containing the Binding Buffer that will inactivate the enzyme and stop the reaction.

1. Purify the DAN with PrueLink Micro column and elute DNA in 50 µL buffer E1.

**8. T7 exo-nuclease and S1 nuclease digestion**

T7 exo-nuclease recognizes the nicks in the circularized DNA, digests the un-ligated strand away from the tags with its 5’ to 3’ exo-nuclease activity and generates a gap in the sequence. The exposed single-stranded region was then recognized and digested by S1 nuclease, which in result separates the mate-paired molecules from the remaining circularized genomic region.

1. T7 exo-nuclease digestion:

50 µL Circularized DNA

25 µL (Y/20) 10x buffer 4

6.5 µL (Y/80) T7 exo-neclease (10 U/µL)

168 µL ddH2O

Incubate the 250 µL (Y/2) reaction at 37C for 30 minutes.

Heat the reaction at 70C for 20 minutes to stop the reaction and keep it on ice for next step.

1. S1 Nuclease digestion:
2. Prepare 25 U/µL of S1 Nuclease by mixing 1 µL of S1 Nuclease with 35 µL S1 Nuclease Dilution Buffer.
3. Mix on ice:

250 µL (Y/2) T7 Exonuclease-digested DNA

8.5 µL (Y/60) 3 M NaCl

10 µL (Y/50) S1 Nuclease (25 U/µL)

Incubate the reaction at 37C For 30 minutes. Immediately stop the reaction by adding the Binding Buffer.

1. Purify the DAN with PrueLink Micro column and elute DNA in 50 µL buffer E1.

**9. End-repair the digested DNA**

1. Digest the un-circularized linear DNA with Plasmid-safe ATP-dependent DNase by mixing:

50 µL Digested DNA

20 µL 5x End Polishing Buffer

2.5 µL 10 mM dNTP

1 µL End Polishing Enzyme 1, 10 U/µL

2 µL End Polishing Enzyme 2, 5 U/µL

24.5 µL ddH2O

Incubate the 100 µL reaction at room temperature for 30 minutes.

1. Purify the DAN with PrueLink Micro column and elute DNA in 32 µL buffer E1.

**10. Add “A” base to the 3’ end of library DNA**

1. Setup reaction on ice by mixing:

32 µL End-repaired DNA

5 µL Klenow buffer (or buffer 2)

10µL 1 mM dATP

3 µL Klenow exo (3’ to 5’ minus)

Incubate the 50 µL reaction at 37C for 30 minutes.

1. Stop the reaction by adding:

5 µL 0.5 M EDTA

200 µL Bead Binding Buffer

145 µL ddH2O

The total volume is 400 µL now.

**11. Isolate the library DNA by binding to streptavidin beads**

The library DNA was isolated by binding to streptavidin beads through the biotin that is labeled at the Internal Adapter in the library molecules followed by washing the library-bound beads to remove all unwanted side products.

1. Pre-wash the beads
2. Resuspend the streptavidin magnetic beads by brief vortexing and inverting. Transfer 90 µL bead suspension into a new 1.5 ml tube.
3. Add 500 µL of Bead Wash Buffer, vortex for 10 seconds, spin down the liquid briefly, place the tube in the magnetic rack for 1 minute, remove and discard the suspernatant.
4. Add 500 µL of 1xBSA (5 µL OF 100x BSA + 495 µL ddH2O), vortex for 10 seconds, spin down the liquid briefly, place the tube in the magnetic rack for 1 minute, remove and discard the supernatant.
5. Add 500 µL of Bead Binding Buffer, vortex for 10 seconds, spin down the liquid briefly, place the tube in the magnetic rack for 1 minute, remove and discard the supernatant..
6. Bind the library DNA to the beads
7. Add the 400 µL library DNA mixture from step 10 to the pre-washed beads, mix wee by brief vortexing.
8. Incubate the tube with rotation at room temperature for 30 minutes.
9. Wash the library-bound beads
10. Prepare 600 µL of 1x Ligase Buffer (120 µL 5x Ligase Buffer + 480 µL ddH2O)
11. Spin briefly the bead tube, place the tube in the magnetic rack for 1 minute, remove and discard the supernatant.
12. Add 500 µL of Bead Wash Buffer, pipet to resuspend and transfer the beads to a new 1.5 ml tube, vortex for 10 seconds, spin down the liquid briefly, place the tube in the magnetic rack for 1 minute, remove and discard the supernatant.
13. Repeat bead wash for 2 more times.
14. Add 500 µL of 1x Ligase Buffer, vortex for 10 seconds, spin down the liquid briefly, place the tube in the magnetic rack for 1 minute, remove and discard the supernatant.
15. Resuspend beads in 94 µL of 1x Ligase Buffer.

**12. Ligate paired-end adapter to the DNA**

1. Mix in a 1.5 ml tube:

94 µL DNA-bound beads

1 µL PE Adapter (50 µM)

5 µL T4 DNA Ligase, (5 U/µL)

Incubate the tube with rotation at room temperature for 30 minutes.

1. Wash the beads
2. Spin the bead tube briefly, place the tube in the magnetic rack for 1 minute, remove and discard the supernatant.
3. Add 500 µL of Bead Wash Buffer, pipet to resuspend and transfer the beads to a new 1.5 ml tube, vortex for 10 seconds, spin down the liquid briefly, place the tube in the magnetic rack for 1 minute, remove and discard the supernatant.
4. Repeat bead wash for 2 more times.
5. Add 500 µL of Buffer E1, vortex for 10 seconds, spin down the liquid briefly, place the tube in the magnetic rack for 1 minute, remove and discard the supernatant.
6. Resuspend beads in 30 µL Buffer E1.

**13. PCR amplification of library**

1. Prepare PCR mixture by mixing on ice:

350 µL Platinum PCR Amplification Mix

7 µL 50 µM PE_1.0 primer

7 µL 50 µM PE_2.0 primer

1. Transfer 24 µL to a 0.2 µL PCR tube and add 1 µL H2O as negative control. Transfer the remaining 340 µL to the tube containing 30 µL template DNA bound beads, mix well and aliquote 50-55 µL to 7 PCR tubes. Run PCR with a 10 cycles program:

94C/3 min,

10 cycles of (94C/15 sec, 62C/15sec, 70C/1min)

70C/5min

4C/hold

1. Combine PCR products from all 7 tubes into a 1.5 µL tube.
2. Put the tube on a magnetic rack for 1 minute. Transfer the supernatant into a new 1.5 µL tube.
3. Purify the DAN with PrueLink Micro column and elute DNA in 25 µL buffer E1.

**14. Measure the library DNA concentration and estimate the size**

1. Measure the library DNA concentration by run 1 µL with Qubit. The total library should be 100 ng or more to ensure the high complexity of your library for high sequence coverage.
2. Estimate the library size by run 1 µL on 2% agarose gel or bioanalayzer.

**Primer Sequences:**

**CAP Adapter (ds) (9/7 bp)**

5’ CTGCTGTAC 3’

3’ GACGACA 5’

**Internal Adapter (ds) (20 bp)**

5’ CGTACATCCGCCTTGGCCGT 3’

3’ TGGCATGTAGGCGGAACCGG 5’

**PE Adapters (ds)**

5' P-GATCGGAAGAGCGGTTCAGCAGGAATGCCGAG

5' ACACTCTTTCCCTACACGACGCTCTTCCGATCT

**PE PCR Primer 1.0 (58 bp)**

5' AATGATACGGCGACCACCGAGATCTACACTCTTTCCCTACACGACGCTCTTCCGATCT

**PE PCR Primer 2.0 (61 bp)**

5' CAAGCAGAAGACGGCATACGAGATCGGTCTCGGCATTCCTGCTGAACCGCTCTTCCGATCT

**RT-PCR validation of gene fusions**

To detect expression of detected gene fusions, we have employed the following strategy. RT primer was used to produce cDNA, and two PCR primers were used to amplify specific fusion product.

| Fusion genes | Primer Name | Primer Sequence (5' to 3') |
| --- | --- | --- |
|  |  |  |
| YAP1-MAML2 | SV7_RT | CAGGGTCGTCTCCGTACCTA |
|  | SV7_PCR_L1 | AAGCTGCCCGACTCCTTCTT |
|  | SV7_PCR_L2 | CCCATGTTAAACAGGCCATT |
|  |  |  |
| ACTN4-FBXO17 (-1 frameshift) | T20_RT | GGTCAGGTGAGGCTGAGAAC |
|  | T20_PCR_L1 | ACTACATGGCCCAGGAGGAC |
|  | T20_PCR_L2 | CAGTCAGCCACACAGATCTCA |
|  |  |  |
| PTPLB-RSRC1 | T21_RT | TGCTGGTCCTGATGTTGAAG |
|  | T21_PCR_R1 | GTCCGAGCATACCTGGCTAA |
|  | T21_PCR_R2 | TGAATGTCTGCTGAACAAAAGAA |
|  |  |  |
| PTK2-SP3 | T22_RT | TCTGCTGACTGGATCTGTGG |
|  | T22_PCR_R1 | AAGTGTTGCCAACCCATCTG |
|  | T22_PCR_L2 | TGCAAATTCTGAAGGGGAAG |

Out of five fusion genes, we confirmed four listed above. The fifth fusion GLYAT-NLRC5 did not validate for the breakpoint PCR or gene-fusion PCR, and therefore probably represents false positive call.

The resulting specific RT-PCR bands were isolated and submitted for Sanger sequencing to investigate the exact fusion sequence of the expressed fusion gene. We obtained the following RT-PCR amplicon sequences:

>SV7 (YAP1-MAML2) RT-PCR

TTTAAGCTGCCCGACTCCTTCTTCAAGCCGCCGGAGCCCAAATCCCACTCCCGACAGCTCCAGGGTTCCTTGAAAAGAAAACAGGTAGTTAACCTATCTCCTGCCAACAGCAAGCGACCCAATGGCTTTGTGGACAACTCATTTCTTGATATCAAAAGAATTCGTGTTGGGGAGAATCTCTCTGCAGGACAAGGTGGCCTCCAAATAAACAATGGACAAAGTCAGATTATGTCAGGGACCTTGCCTATGAGCCAAGCACCCCTGCGAAAGACTAACACTCTGCCATCCCATACACATTCTCCTGGCAATGGCCTGTTTAACATGGGA

>T20 (ACTN4-FBXO17 (-1 frameshift)) RT-PCR

ACTACATGGCCCAGGAGGACGACTGGGACCGGGACCTGCTGCTGGACCCGGCCTGGGAGAAGCAGCAGCGCAAGATGGTGCTCCAAGAGGCAGCTTGTGGACCTGGTGATGGAAGGGGTGTGGCAGGAGCTGCTGGACAGCGCCCAGATT GAGATCTGTGTGGCTGACTGA

>T21 (PTPLB-RSRC1)_RT-PCR

GTCCGAGCATACCTGGCTAAGGGTAGCTACCATAGCCTTTATTATTCAATTGAAAAGCCTTTGAAATTCTTTCAAACTGGAGCCTTATTGGAGATTTTACATTGTGCTATAGACCAAGCCACCCTGGTAGAACAAGTAAAAAGAGTAAAAGAAATTGAAGCTATTGAAAGTGATTCTTTTGTTCAGCAGACATTCA

>T22 (PTK2-SP3)_RT-PCR

TTGAAGTGTTGCCAACCCATCTGATGGAAGAGCGTCTAATCCGACAGCAACAGGAAATGGAAGAAGATCAGCGCTGGCTGGAAAAAGAGGAAAGATTTCTGACAGGTGATTTGGCTTCTGCACAGTTAGGAGGAGCACCAAACCGATGGGAGGTTTTGTCAGCCACACCTACAACTATAAAAGATGAAGCTGGTAATCTAGTCCAGATTCCAAGTGCTGCTACTTCAAGTGGGCAGTATGTTCTTCCCCTTCAGAATTTGCAA

The four sequences above correctly demonstrated the fusion point predicted from the breakpoint position and the annotated gene. The two colors represent exonic parts representing fusion partners.

**Sanger sequencing of PCR-validated somatic breakpoints in NPC-5989**

We have performed validation of 10 breakpoints from NPC-5989 using Sanger sequencing. We were able to correctly confirm 10/10 breakpoints. Below we provide the Sanger sequences, the breakpoint coordinates as reported by SMASH and breakpoint coordinates inferred from the BLAT alignments of Sanger reads.

**Breakpoint validation using PCR and Sanger sequencing**

No quality-based trimming has been performed to Sanger sequences. Because the amplicons were typically fairly short, the flanking sequences (marked in grey) tend to be low quality bases representing non-specific background signal.

SV1: breakpoint is confirmed by two Sanger reads

SMASH predictions:

bp1: chr8 128468417 -

bp2: chr8 128481643 –

by Sanger:

bp1: chr8 128468417 -

bp2: chr8 128481651 -

>Sv1_L2

GACTGGTAACAATCAGCTGGTCATTATTTTGATTGCTTTTTATTGTATCTTGTGTTTATT

GAAAACCTGAAAGCATGTGAGAGCTAGAAGAATCCTTGGGAATTATTTAATACAGTTTCC

TTGTCATACTGATGGGGAAGCTGCAAGCCACTTCATCTTTCTAGTCCTCAGCTTCCAGTT

TTGTAATAGGAGAAGCTGGGCTAGATTTTCTGTGAGCATTAAGGAATACTCTCTGAACAA

AACCAAAGCTTGAAGAGCATATTCCGTGTCAAAGTAGAACTAAAAATGGAGGCTGAGCAC

AATGGGAGGAAAGAATCTCTTCACTGAAGAGGAGGGTGTTGGTGAGCATGGATTGAATGG

AGATGGAAAATACCATGAGCAATCAGATTAAGCAGGGCCCTGAAATCCAGGCAGATAAGT

TGAGTCTTGGTGCCACATGTCAACTTTCCTTCTACTGGGAGACAATATGGGGCAGAGAAA

AGAGCCATACTGTGATTTTGGACCAATGCAAACCAAGGATGAGGAGTTAAAAAAGGAATT

GCAGGATGAAGCTATCAAACATATTGACGATTTTTACGATTCTTACAATAAAAAGAAGGA

ACAACAATTGGAAGATGCTGCTAAGGAAGCTGAGGCTTTCTTAAAGAAAAGAGATGAATT

TTTTGGTCAAAGACAATACGACCTGGGATCGTGCACTTCAATTAATTAACCCAAGAATGA

TGCCGATATCATTGGGGGTAGAGACAGGTCTAAGTTTAAAGAAATTCTATTTGAGATTGA

AAGGTAACGCGAAAGGCTCCCGGGATGCTGGTAGTTACCCTCAAGGCAGGTGAAGGGCGA

ATTTCAAGCACACTGGCGTGCCGTTTACTAGTTGGATCCCGAAGCTCGGGTACCAAAGCT

TGGTCATAGTCAGGGTTATTAGGCTGGTCTTCTCT

Red: chr8 - 128468417 128468660

Blue: chr8 - 128481392 128481651

>SV1_R2

GACAGTCACCCTTTCTCTGCCATATTGTCTCCAGTAGAAGGAAGTTGACATGTGGCACCA

AGACTCAACTTATCTGCCTGGATTTCAGGGCCCTGCTTAATCTGATTGCTCATGGTATTT

TCCATCTCCATTCAATCCATGCTCACCAACACCCTCCTCTTCAGTGAAGAGATTCTTTCC

TCCCATTGTGCTCAGCCTCCATTTTTAGTTCTACTTTGACACGGAATATGCTCTTCAAGC

TTTGGTTTTGTTCAGAGAGTATTCCTTAATGCTCACAGAAAATCTAGCCCAGCTTCTCCT

ATTACAAAACTGGAAGCTGAGGACTAGAAAGATGAAGTGGCTTGCAGCTTCCCCATCAGT

ATGACAAGGAAACTGTATTAAATAATTCCCAAGGATTCTTCTAGCTCTCACATGCTTTCA

GGTTTTCAATAAACACAAGATACAATAAAAAGCAATCAAAATAATGACCAGCTGATTTTG

CTTTCCTTCATTACCCTCATCTAAGCCACCAGCAAAC

Red: chr8 + 128481423 128481648

Blue: chr8 + 128468417 128468700

SV2: breakpoint is confirmed by two Sanger sequencing reads

SMASH predictions:

bp1: chr1 198311272 -

bp2: chr1 203179743 +

By Sanger:

bp1: chr1 198311245 -

bp2: chr1 203179702 +

>sv2_L2

CGGCATGGGGCTAGTAAGTGACTCTTCTTCTAACTGAGGGAGTCTATGTTAGCTAGTAGA

GAGATGGCAGTGTGTCCATTAGTCATAGGCAAAGTCTAAGGATGAGTTGAAAGCCTAATC

CTATTGTTCACTATGGAGTGCCCCTGAAAAAAAGTTAACTTCATCTGAGTCTACTTTTCC

TCCAGTTTCAAAGGATGATAATATGTACCTTACAGGGCTCGTAGAAGAATTACATGGGAA

GATGTATTTGTACAAGTTTGTGAACTATAAATCAGGGGTCCACATGTGGAGCATTGGGCC

ACAGAAGATACCATACAGTGTGATTCCATTTATGTAAGTTTCAAAACCAGTGCAAACTAA

ACAATTTTATTTTAAAATGCACACCTAGCTGGTAAAACTACAAGAAAAACAAGAAAAGGA

ATAACCAAAATCTAGTTAGAGGGCTAGGGGATTAGGGA

Blue+green: chr1 - 198311245 198311529

Green+Red: chr1 + 203179702 203179877

> SV2_R1

CGCCTGAGGTAGCTTTTCTTGTTTTTCTTGTAGTTTTACCAGCTAGGTGTGCATTTTAAA

ATAAAATTGTTTAGTTTGCACTGGTTTTGAAACTTACATAAATGGAATCACACTGTATGG

TATCTTCTGTGGCCCAATGCTCCACATGTGGACCCCTGATTTATAGTTCACAAACTTGTA

CAAATACATCTTCCCATGTAATTCTTCTACGAGCCCTGTAAGGTACATATTATCATCCTT

TGAAACTGGAGGAAAAGTAGACTCAGATGAAGTTAACTTTTTTTCAGGGGCACTCCATAG

TGAACAATAGGATTAGGCTTTCAACTCATCCTTAGACTTTGCCTATGACTAATGGACACA

CTGCCATCTCTCTACTAGCTAACATAGACTCCCTCAGTTAGAAGAAGAGTCACTTTTACA

TTAACCCACAGGTTAGAGCGAATGCCCCTTTGTTTTCTAC

Red+Green: chr1 - 203179702 203179837

Green+Blue: chr1 + 198311245 198311573

SV3 : breakpoint is confirmed by two Sanger sequencing reads

SMASH predictions:

bp1: chr1 197592939 +

bp2: chr1 198304513 -

By Sanger:

bp1: chr1 197592953 +

bp2: chr1 198304567 -

>5989sv3_2_SV3_L2_2012-04-28_D07.ab1

TTATAGCCCTGGTAATTGTTACAGTCAATGAACCTATATTGATACATCATTGTCATCTGAGTCCCTAATTTACATCAGAGTTCACACTCTAGGATAAAACAAATTTACAGTGACATGTATCCACCATATTGAGTGACTTTACTCTTGAGCATGGTTTGCCAAAAGGATATGAACTAGTTAGAAATACTTAAAATCATCAAATAATTTGAAATGATTACACCATCTCAGCAATAAATGAGATATTAAATTTAAAAAATGACATACAGAGTTAAAAGCGGAAGGCTACAAATGTTTATGTGTAGTTTAGTAAAATTGGTTATTTATGAGCCACTACCGATAAATACAAACAAGGGTTTTGCGAGTGGGTTGTATGTCGCCTTCGGCTATGATCTCAGGATGTTTTTTTGCATTTAACACAAAATTAATTGCTTCTACGGGGTTGTCAAAATCATTTGTTTTTTGGTTTGGAATTGCAGAAACCTTATGTGCCCCTTAATGTGGTACCATTCACAAAAT

Red: chr1 + 197592836 197592953

Blue: chr1 - 198304347 198304567

>5989sv3_2_SV3_R2_2012-04-28_C09.ab1

ATAACCGCTTCACTAACTACACATAAACATTTGTAGCCTTCCGCTTTTAACTCTGTATGTCATTTTTTAAATTTAATATC

TCATTTATTGCTGAGATGGTGTAATCATTTCAAATTATTTGATGATTTTAAGTATTTCTAACTAGTTCATATCCTTTTGG

CAAACCATGCTCAAGAGTAAAGTCACTCAATATGGTGGATACATGTCACTGTAAATTTGTTTTATCCTAGAGTGTGAACTCTGATGTAAATTAGGGACTCAGATGACAATGATGTATCAATATAGGTTCATTGACTGTAACAATGTACCAGTGTGGTTGGGTATGTTAATAATGGAGAAGCCATGGGAATCTTCTTTTATGTGGTTATAAGAGCTAAGAGCGTCCCCCACATTTGTCAGACAAACAACACAGTAAATTGATTTGCTGTACTAAATATCCAGATTAATTATAAGGCTTTACTAATTAAGATAGTGAGTTATTGGGGCAGCAAAGGATAAATACACCAATAGAACAGAAAGATTCCCATGTGTGTACACAAACATAATTTGTTTCAGGGACGGTATTGTAGGTTAGTATTAAAGGGATAG

Blue: chr1 + 198304390 198304567

Red: chr1 – 197592799 197592954

SV4 breakpoint is confirmed by two Sanger sequencing reads

SMASH predictions:

bp1: chr1 154115213 -

bp2: chr8 128829576 -

By Sanger:

bp1: chr1 154115213 -

bp2: chr8 128829589 -

>5989sv4_2_SV4_L7_2012-04-28_G07.ab1

GGGCATGATAGAGTATATCTATTTTCTCATTTGGAGCTCATAGATGAATAATAATTCTGAGTATAATTTAATGTATTAAC

TACACGTTTTCATAAAATATTCCTGCTATTGTTAGTTATCTCAGAACTTTTCCTTTCTTTTTTTTTTTTTTGGGCAGGGG

GAGGGGAACAGAGTTTTGCTTTTGTTGCCCAGGGTGGAGTACAATGGCATGATCTTGGCTCACTGCAACCTCTGCCTCCTGAGTTCAAGCAGTTCTCCTGCTTCAGCCTCCTGGGTAGCTGGGATTACAGGCCTGCGCCACCACTCCCGGCTAATTTTGTATTTTTAGTAAAAATGGGCTTTCACCATGTTGGTCAAGCTGGTCTTGAACTCCTGACCTCAGGTGATCCACCCGCCTTGGCCTCCCAAAGTGCTGGGATTACAGGCGTGAGCCACCGCGCCTGGCCACTTTCTTTTTTTTTTTTGAAATGGAGTCTCCCTCTGTTGCCTAGGCTCAAGTGCAGTGGTGCGATCTTGGCTCACTGCAACCTCTGCCCTCCCGCTTCAGGCGATTCTTGTGCCTCAGCCTCCCAAGTAGCTGGGAATACAGGCACGCGCCACCACACCCGTTAATGTTAAATTCACAGACAGGGAAACTACTGAGGTAGACAGATGTTAAGTTCATTGCATAATGAACTAAGTAATAAAATGAGGCAAAGGCCCAGCAGGTCTGTGTCTCTCCTATTCCAGAACAGCGCTCTCATCCCCCCCCCCCCCGGAATT

Blue: chr1 – 154115213 154115814

Red: chr8 - 128829465 128829589

>SV4_R2

GACCCTTAGAAGACAGACCTGCTGGGCCTTTGCCTCATTTTATTACTTAGTTCATTATGC

AATGAACTTAACATCTGTCTACCTCAGTAGTTTCCCTGTCTGTGAATTTAACATTAACGG

GTGTGGTGGCGCGTGCCTGTATTCCCAGCTACTTGGGAGGCTGAGGCACAAGAATCGCCT

GAAGCGGGAGGGCAGAGGTTGCAGTGAGCCAAGATCGCACCACTGCACTTGAGCCTAGGC

AACAGAGCGAGACTCCATCTCAAAAAAAAAAAAGAAAGTGGCCAGGCGCGGTGGCTCACG

CCTGTAATCCCAGCACTTTGGGAGGCCAAGGCGGGTGGATCACCTGAGGTCAGGAGTTCA

AGACCAGCTTGACCAACATGGTGAAAGCCCATCTCTACTAAAAATACAAAATTAGCCGGG

AGTGGTGGCGCAGGCCTGTAATCCCAGCTACCCAGGAGGCTGAAGCAGGAGAACTGCTTG

AACTCAGGAGGCAGAGGTTGCAGTGAGCCAAGATCATGCCATTGTACTCCACCCTGGGCA

ACAAAAGCAAAACTCTGTTCCCCTCCCCCTGCCCAAAAAAAAAAAAAAGAAAGGAAAAGT

TCTGAGATAACTAACAATAGCAGGAATATTTTATGAAAACGTGTAGTTAATACATTAAAT

TATACTCAGAATTATTATTCATCTATGAGCTCCAAATGAGAAAATAGATATTACTTCTAA

TCTACTTTTGCCACTCAAGTTTTTTTTC

Red: chr8 + 128829494 128829589

Blue: chr1 + 154115213 154115852

=============================================================================

SV5 breakpoint is confirmed by two independent Sanger sequences

SMASH predictions:

bp1: chr11 95987974 -

bp2: chr11 102115057 –

By Sanger:

bp1: chr11 95987951 -

bp2: chr11 102115058 -

>5989sv5_2_SV5_L6_2012-04-28_H07.ab1

TGGATTCGAGCTTTGTAGCCATATTGATAATTTTGTCTTTATCCTTAGCACAGTGAGAAGGTATTAAAGGATTTTATGCAGGGAAGTGACATGATCATATTTGTGTTTTCAAAAGAGCCCTCAGGCTGGGTGTGGTAACTTGCGCCTGTAATCCCAGCACTCTGGGAGGCCATGGCAGGCGGTGGGCGGATCGCTTGAGCCCAGGAGTTCCGGACCAGCATGGGCAACTTGGGGAAACCCCACCTCTAAAAAAAAAATGCCAAAAAAATTTTAGCTGGGTGTGGTGGCACTCGCCTGTAGTCCCAGCTGCTCGGGAGGCTGAGGTGAGAGAATCACCTGAGCCTGGGAGAGGCTGTAGTCAGCTGTGATTGCGCCATGCACTCCAGCCTGGGTGACACAGTGAGACCCTGTCTCAAAAAATAAATAAAAAATAAAAAAAGGAGCCCTCAATTTATCCTCTGCCTCTTAGTAGAGATGAGGCTTCACCGTGTTGGCCAGGCTGGTCTCAAACTCCTGGCCTCAAATGATCTGCCCGCCTCAGCCTCCCAAAGTGCTGGGATTACAGGTGTGAGCCACCACGCTCGGCCATTATTAGTGGTATTAACTCCCCATTGTCCATTCCAGTTCCTGACATATAGCAAGCCCCTATCCACCCCCA

Blue: chr11 – 95987951 95988410

Red: chr11 - 102114882 102115058

>5989sv5_2_SV5_R2_2012-04-28_G09.ab1

GTGGACGCATGGCATGGGGAGTTATACCACTAATAATGGCCGAGCGTGGTGGCTCACACCTGTAATCCCAGCACTTTGGGAGGCTGAGGCGGGCAGATCATTTGAGGCCAGGAGTTTGAGACCAGCCTGGCCAACACGGTGAAGCCTCATCTCTACTAAGAGGCAGAGGATAAATTGAGGGCTCCTTTTTTTATTTTTTATTTATTTTTTGAGACAGGGTCTCACTGTGTCACCCAGGCTGGAGTGCATGGCGCAATCACAGCTGACTACAGCCTCTCCCAGGCTCAGGTGATTCTCTCACCTCAGCCTCCCGAGCAGCTGGGACTACAGGCGAGTGCCACCACACCCAGCTAAAATTTTTTTGGCATTTTTTTTTTAGAGGTGGGGTTTCCCCAAGTTGCCCATGCTGGTCCGGAACTCCTGGGCTCAAGCGATCCGCCCACCGCCTGCCATGGCCTCCCAGAGTGCTGGGATTACAGGCGCAAGTTACCACACCCAGCCTGAGGGCTCTTTTGAAAACACAAATATGATCATGTCACTTCCCTGCATAAAATCCTTTAATACCTTCTCACTGTGCTAAGGATAAAGACAAAATTATCAATATGGCTTACAAAGCTCTTCATGAACTGTTCGTTGCATATGTGTTCAAAGCCAATTCGAACAGTTCATGAAGAGCTTTGTAAGCCATATAGATAATTGTGTCTTTGAGCCTATAGCACAGCTGAGAAAGTATTAAAGGATTTTATGCAGGGAAGTGACATGATCATATGTGTGTTTTCAAAAGAGCCCTCAGCGGGTGTGGTAAGTGCGCGTATCGCATTTAGGAAGGCATGGCAGCGTGGGCGATTCCTGAGCAGAGTTCGACACAGGCACTTGGGGAAACCCACCCTCTAAAAAAAATGCCAGAAAATTACAGGTTAGGTGACATCCGTACGCAGCTCTCGGAGGCTAAGGTGAAGGAATACTAACCTGGAAAAGCTGTCCTTTATGACTGAATCC

Red: chr11 + 102114913 102115058

Blue: chr11 + 95987951 95988432

SV6 breakpoint is confirmed by two Sanger sequencing reads

SMASH predictions:

bp1: chr11 101983780 -

bp2: chr11 102115202 +

By Sanger:

bp1: chr11 101983762 -

bp2: chr11 102115098 +

>5989sv6_2_SV6_L2_2012-04-28_B08.ab1

AATGACTGGAGATCAGTAGAGTCATTAATGCCTTAAAGTGATACACCTTTTTGAGTTTCCCATCAGAATAAGTATGATTTAGGAAATCATTAGGAGAAATAAAAGTCGAATTTACTGTAGTCCCAGCTACTTGGGAGGCTGAGGCAGGAGAATCGCTTAAACCTGGGAGGCAGAGGTTGCAGTGAGCTGAGATTGTGCCACTGCACTCCAGCGTGGATGACAGAGTAAGACTCCGTCTCAAAAAAAAAAAAAAACAAAAAAACCTACCACTACTAATAGCAGCTAAGCTATTAAAAGCTTAATGTATGTCAGGCACTATTCTAAAAGCTTTGTTAACTCATTTAATACCAATGATGAAAAAGCATGTTCCTTGCTTTCAAAATGCTCATTGTCAAGGGAAGTGGTTCTAAATCCGGGCTGGATATTAAAATCTCTTGGAAAGTTTTTAAACACCTTGATGTGTGGGCTCCACCTGCCAAAAATTTGGCTTTAACTGGACAAGGGTGGGGGGGAAATTATAAAAACACTTCAGGGTGTTTAAAAACTTTCGAGAGATCCTAAAATCCGCCGGATTTAGAACCACTTCCTTGACAATTAGGATTTGAAAGCAGGAAAAGCTGATGCATCATGGTTTAAATGAGTTAACAAAGCTTGAGGAAGAGTGCCGACAACATAAGCTCTAAAGCTAGCTGCTATAGGTAGTGGGTGGGTTTTTTTTGTTTTTTTTTTTTTTTGAGACAGAGTCTTACTCTCTCATCCACGCGCGAGTGCGGTGGCACACTCTGCACCCCCTCCCCCCCCCCCGAAATGTATGAGTGGAGTAGGGGCGGCCGGCGACCCCCCCGCGAGTTTTGTAAGACAGAGCGCCTTTTCTCATATATGGGTCCATGATCTCGCGCGGGACACCCCCTCGGGGGAGAGAGACGCACATTTTGTGTTTGTTGGTGTGCAGAGAAACTCTGGGTCGCTGCTTCTTTCTTCTTGAGAGTGGAGGAGCACC

Blue: chr11 - 101983762 101983875

Red: chr11 + 102115098 102115486

> SV6_R1

AAAATCTACTGCTTTAGTAGTGGTAGGTTTTTTTGTTTTTTTTTTTTTTTGAAACGGAGT

CTTACTCTGTCATCCACGCTGGAGTGCAGTGGCACAATCTCAGCTCACTGCAACCTCTGC

CTCCCAGGTTTAAGCGATTCTCCTGCCTCACCCTCCCAAGTAGCTGGGACTACAGTAAAT

TCGACTTTTATTTCTCCTAATGATTTCCTAAATCATACTTATTCTGATGGGAACTCAAAA

AGG

Red: chr11 - 102115264 102115097

Blue: chr11 + 101983763 101983831

SV7 is confirmed by two Sanger sequencing reads

SMASH predictions:

bp1: chr11 95987965 +

bp2: chr11 101983680 -

By Sanger:

bp1: chr11 95987962 +

bp2: chr11 101983497 -

>5989sv7_2_SV7_L2_2012-04-28_D08.ab1

ATGTGCGTTCAGAGCAAGATGGGTAAGCAAAGCAATGTGCTGAAATTTTTGCAATGTAACAAAATGGAATATATTTGTCAGAGGCAGAGGATAGAACTGCTGGATATAAATTCTTGTAAAAATTATTTACTAGAAGAAAAAGTACACTTCCCAGTTGTAATTCTTTGTGGCTGATGCCACAAAATGGGGGATCCAATCTATGTGTATTATACTTTGAAAACATACCGTGCAGTCTGTAGGGTGCATGCCAACATACATTTACCCACAATGAGTCCATAAACCCACTTCGAGGAACGTGTAGTTTAGTAAAATTGGTTATTTATGAGCCACTACCGACCAAACCCAAATCCCCCATTTTTTGGCTAGCTGGTTTGAACCAACTCACTAAGTAGCAAGCGTATTTTTTTTGACTCCAAGAGAAAACTACTTTTGTTTTGGGGGTTGGCTAAGTGATCTTGGTTGACGCTTGAAGTGGCGGAAAACAGGGGTACGCTGAACGTGGTCCGATACACGAACAATCATCTTAATGGTTCCAGGGGGCCCTTCTTGAG

Red: chr11 + 95987875 95987962

Blue: chr11 - 101983497 101983697

>5989sv7_2_SV7_R2_2012-04-28_C10.ab1

TACAAAATATAATGTATGTTGGCATGCACCCTACAGACTGCACGGTATGTTTTCAAAGTATAATACACATAGATTGGATCCCCCATTTTGTGGCATCAGCCACAAAGAATTACAACTGGGAAGTGTACTTTTTCTTCTAGTAAATAATTTTTACAAGAATTTATATCCAGCAGTTCTATCCTCTGCCTCTGACAAATATATTCCATTTTGTTACATTGCAAAAATTTCAGCACATTGCTTTGCTTACCCATCTTTGCTCTGGAACGACTTTTAATTCTTCTTTTGAAGTTTTGGTTGAATTGGAACAATGTACCAGTGTGGTTGGGTATGTTAATAATGGAGATTGCCAGGGGACTCTTTAGCCACGTGGAAAAGTGCAAGAGAAGAATCTCAAGCACATTTCTGAACTGCACGACACAGTATCTTGTATTGCTTATGTACATGTCCAGAATGACATACGGTGTTAATAATTAGGAGCCCGAGTTCTGGGGGCAGAACACACTCTTCTCCAATG

Blue: chr11 + 101983530 101983697

Red: chr11 – 95987843 95987962

SV8: breakpoint is confirmed by Sanger sequencing

SMASH prediction:

bp1: chr1 197593291 –

bp2: chr1 203179168 –

By Sanger:

bp1: chr1 197593273 -

bp2: chr1 203179452 -

>5989sv8_0_SV8_L0_2012-04-28_E08.ab1

CCCAGTCATGTTGTTCTTTTATAATGCTACACTGTTTTGAATATTGTAGCTTTATAATAAGTTTTGAACTCAGATAGTGT

CAGTCCTTCCAACTTGATGTATAGATTACAATCCCAATCAAAATCCCAGCAAGTTGTTGTGTAACTTTTCCCTCCCGTCAGCAGAATTCTCTTGTATCCCATCCTCACCATTACCATATCATACTTTATACCAGTTTGAGAGATGTAAAATGGTATCCCGTTAGAGTTTCAACTTGCATTGTCCTAATTACTCATTATAGTTTCAGCATCTTTTCCTATACCTGTAAGCAATATGTGTTTGTCTTTTGTGAATAGTCCAATGTGTCTCTTGTCATTTTTCTATTGGGTTGTTTATATCTTTCTTACTGAAATGTAGGCGTTCTTTCCATGCTCCGAACACAAATCCACTCATGACTGCAGGTTTGGCTAAATCTTCTGGGTTGAGGCTTGGCTTTTCATTCTCCTTAGGTGCCTTTAATGTAGTCAGATTTACCAATCTTATTCTTTATGGTTTTTACTTTCTGTATCTTGAGAAATTTTTCTCTAGTCTGAAGTCAAGAGCTATTTTCCTATATTATCTTCTAAAAGTTTTGTAGCTTTTTTCCCACTTAAGCCTTTAGTCTTACTGAAATTGCCATTTAAATATGCTGTAAGGTTGTATCTAATTTTTTTTCTATACGGATAACTGGTTATTCAAGCACTATTTATTGAATAATCTATCCCTTTCATACTAACCTACAATACCATCCCTGAAACAAATTATGTTTCTGTACACACATGGGAATCTTTCTGTTCCATTGGTGTATTTTTCTTTTGCTGCCCCAATAACTCACTATCTTAATTACTAAAGCCTTATAATAAATCCTGATATTTATTACAGCAAATCTTTATACTGTGTTCTTTGTTTCAGAAATGTCTTGGATGTTCTTAGCTCTTACTTTTCCATGTATATGTTAGAATTATATTGCCAAATTCCATTA

Red+Green: chr1 - 197593273 197593348

Green+Orange: chr1 + 197593122 197593178

Blue: chr1 - 203178588 203179452

SV9: breakpoint is confirmed by two Sanger sequencing reads

SMASH predictions:

bp1: chr2 66298242 +

bp2: chr2 66324118 +

By Sanger:

bp1: chr2 66298241 +

bp2: chr2 66324033 +

>5989sv9_0_SV9_L0_2012-04-28_F08.ab1

GGGCGTCTAAGCAGCCCCTGGTGAGAGCGGTCCCCGACCAGGGCTGTGTTGCACAGACACACCCAGAAATAATGTTTTACCAGCTGTTTGGGCATACTTTAATGCTGATGAGTTGACATACAATTGTCCATCACAGGGCCTGAGCAGTGCAATCCCTGTAAAAGGACAATTGTATGTCAACTCATCAGCATTAAAGTATGCCCAAACCCTGGTAAAACTTATTTCGGGGTGTGTCTCTGCAACAAACTTTATAAAATAAACTTTCAATTTTGCTGCATCTGCGCTTGCACTCTATTTGTTCCTGCTTTTTTATGGTTATTTCTTGGGTGACCCACCCGCCCTGGCCCCCCAGCATTTTTCGGATTTTTGGCTTGAACCACCGCACTAGGCCGCATTCTTTTTTTTTTTGGGCTGGAGAGAGAAATACATTGGAAAGGCCCGAGTGGTTTATTAATCTTCTGCCTCGCAGGAAATACGAGGCTCCCCCGTTGGGCTAATCTTGGTCCCAAACCCCACAAGTAGGGGGAAAGACCCGCACGCCCCACTCCCACCCGTTAATGTTTAATTCTTCTACCGGCAAAACACAGGGGTAGACAGAAT

Blue: chr2 + 66298198 66298241

Red: chr2 + 66324033 66324140

Green: chr2 - 66324035 66324109

>5989sv9_0_SV9_R0

GAAGGCGGTTCATGTATGTCACTCATCAGCATTAAAGTATGCCCAAACAGCTGGTAAAAC

ATTATTTCTGGGTGTGTCTGTGCAACACAGCCCTGGTCGGGGACCGCTCTTCACCAGGGG

GCTGCGTCTCAGGCAGGCGAGCGCAGTTCTTCGGTGCTTATTAGACAGGAGTGTTCAGTG

CTTATTACAAGAGATCCTGAATACATCTCTTACAAAACTTGTATCAGGCTATGCTGTGTA

CCCAGATTTGGAAACCTAAAAACTTATAGAAGCCCATGCGTCTCCATCCATTGACGTCTT

GAATTCAAAACCATTTTGATTAGAAAAGTGAAAAATGGAGTTTGCCAAAAAAACACAAAT

AAACACGTGGGGAGGCGAGAGCCAGGAATCCCCAATACCCTTGTGGCACAACCAAGACAA

GAAATAGAATTGCTGAGGATAAACGTTAGGATAAAATATAAGGCGCTATTAAATAACATA

CT

Blue: chr2 – 66324033 66324102

Red: chr2 – 66298162 66298241

Blue+Red: chr2 – 66298162 66324102

SV10: breakpoint is confirmed by Sanger sequencing

SMASH predictions:

bp1: chr1 155119765 +

bp2: chr1 155710691 +

By Sanger:

bp1: chr1 155119758 +

bp2: chr1 155710694 +

>sv10_R3

CGGGCAACGAATGGGGTAAGCCTGGCCAAGTCATTCAAGCCTATACGCCCAGCAATTTGGGAGGCTGAGACAGGTGGATCACTTGAGTCCAGAAGCTTGAGACCAGCCTGGGCAATATAGTGAGATCCCATCTTTATTAAAAAAAAAAATCAAAATTAGCCACGTGTGGTGGTGTGTGCCTGTAGTCCTAACCACTCGTGGAGCTGAGGTAGGAGGATTGAGTCCAGAAGGTCGAGGCTGTAGTGTGGCCTTACACTCCAGCCTGGGTAACAGAGAGTGAGACCCTGTCTCAAAATAATATTAATAAAAACATAAACTTTAGGTCAGTTTCCCTTTTTTATTTCCTTTTTGTTTTTTGAGACAGAGTCTTGCTCTATCGCCCAGACTGGAGTGCAGTAGCATGATCTTGGCTCACTGCAACCTCTGCCTCCTGGGTTCAAGCAATTCTCCTGCCTCAGCCTCCTCAGTAGCTGGGATTACAGGCGTGCACCACCACACCCAGCTAAATTTTGCATTTTTAGTAGAGATGGGGTTTCACCATGTTGGCCAAGCTGGTCTCGAACTCCTGACCTGGTGATCTGCCCACCTCAGCCCCCCAAAGTGCTGGGATTATAGGTGTAAGCCACCATGCCCGTCCATTTTTAATATTTTTTTTTATAGAGACAAGGTCTCACTATGTTGCCCAGTCTGGTCTCAAACTCCTGGCCTGACACGATTCTCTTGCCTTGTCCTCCCAAGATGCTGGGATTACAGGTATGAGCCACCATGCCCAGCAAAAGCCCCAATTAAAA

Blue+Green: chr1 - 155710694 155711052

Green+Red: chr1 - 155119334 155119758
