# Supplementary material for: Discovery of recurrent structural variants in nasopharyngeal carcinoma
Source: HighWire-hosted journal article supplement (doi:10.1101/gr.156224.113), 2013-11-08
Supplement: Supp_Table_T3_SMASH_and_Hydra_with_simulations.xlsx [file Supp_Table_T3_SMASH_and_Hydra_with_simulations.xlsx]

## Sheet: Sheet1
				6 discordant mate-pairs per breakpoint						20 discordant mate-pairs per breakpoint						50 discordant mate-pairs per breakpoint						100 discordant mate-pairs per breakpoint
				SMASH			Hydra			SMASH			Hydra			SMASH			Hydra			SMASH			Hydra
				error1	error2		error1	error2		error1	error2		error1	error2		error1	error2		error1	error2		error1	error2		error1	error2
Deletion1	chr1 1000000 +	chr1 2000000 +		828	187		778	187		29	41		27	41		1	62		3	62		1	115		1	115
Deletion2	chr2 1000000 +	chr2 2000000 +					115	61		42	22		40	22		41	101		39	101		57	6		55	6
Deletion3	chr3 1000000 +	chr3 2000000 +					192	40		20	81		18	81		3	97		1	97		64	59		62	59
Deletion4	chr4 1000000 +	chr4 2000000 +					767	1518		140	119		138	119		202	181		200	181		7	94		5	94
Deletion5	chr5 1000000 +	chr5 2000000 +					57	213		260	111		258	111		59	91		67	91		16	9		14	9
FP Deletions				0			0			0			0			0			0			0			0
Duplication1	chr1 18000000 +	chr1 17000000 +		473	333		473	283		179	3		179	95		28	19		19	16		87	24		87	32
Duplication2	chr2 18000000 +	chr2 17000000 +		71	196		71	146		32	45		32	357		32	3		32	1		20	14		20	12
Duplication3	chr3 18000000 +	chr3 17000000 +					422	34		186	244		186	242		34	1		34	1		53	5		53	3
Duplication4	chr4 18000000 +	chr4 17000000 +		93	399		93	349		6	234		6	232		11	80		80	9		17	29		17	27
Duplication5	chr5 18000000 +	chr5 17000000 +		789	239		789	189		82	129		82	127		74	2		2	72		57	87		57	85
FP Duplications				0			0			0			0			0			0			0			0
Inversion1	chr1 3000000 +	chr1 4000000 -		1450	293		496	715		151	182		636	75		138	17		182	113		76	42		235	134
Inversion1	chr1 3000000 -	chr1 4000000 +		496	715		1400	243		36	75		149	660		105	113		105	2316		18	56		18	2408
Inversion2	chr2 3000000 +	chr2 4000000 -		342	232		535	839		178	215		211	397		152	123		362	111		4	10		48	74
Inversion2	chr2 3000000 -	chr2 4000000 +		535	879		292	182		341	397		176	767		44	42		150	2693		21	10		2487	10
Inversion3	chr3 3000000 +	chr3 4000000 -					761	383		33	92		1207	155		35	78		29	41		36	50		3	204
Inversion3	chr3 3000000 -	chr3 4000000 +		761	383					25	155		230	591		29	20		2484	20		3	31		110	31
Invertion4	chr4 3000000 +	chr4 4000000 -		902	397		102	991		91	136		661	321		28	60		12	466		6	1		139	66
Inversion4	chr4 3000000 -	chr4 4000000 +		102	27		872	347		62	226		89	134		12	37		2490	37		139	66		67	318
Inversion5	chr5 3000000 +	chr5 4000000 -		911	402					42	3		517	114		71	115		573	185		1	13		184	284
Inversion5	chr5 3000000 -	chr5 4000000 +		418	551		861	352		173	114		40	831		61	170		26	2992		19	34		19	2842
FP Inversions				0			0			0			2 extra			0			7 extra			0			13 extra
Translocation1	chr1 5000000 +	chr2 6000000 +		1417	663		424	620		423	256		10	241		46	457		25	14		8	32		24	19
Translocation1	chr1 5000000 -	chr2 6000000 -		424	670		1367	663		10	143		431	256		25	16		44	457		24	21		6	32
Translocation2	chr3 5000000 +	chr4 6000000 +		97	693		651	225		225	177		269	100		88	61		63	5		8	30		7	5
Translocation2	chr3 5000000 -	chr4 6000000 -		651	375		47	693		269	102		223	177		63	7		86	61		7	9		6	30
Translocation3	chr5 5000000 +	chr6 6000000 -		36	606					26	1		1086	204		31	1		27	367		0	3		5	333
Translocation3	chr5 5000000 -	chr6 6000000 +		199	585		14	656		148	204		148	2096		27	59		2310	59		5	62		2160	62
Translocation4	chr7 5000000 +	chr8 6000000 -								276	288		978	24		61	40		572	14		37	7		36	178
Translocation4	chr7 5000000 -	chr8 6000000 +		31	459					85	24		85	2847		128	11		128	2048		36	36		2674	36
Translocation5	chr9 5000000 +	chr10 6000000 -		435	458					128	149		330	637		41	36		92	144		64	12		26	70
Translocation5	chr9 5000000 -	chr10 6000000 +					795	127		637	133		147	310		144	12		12	2571		69	19		2876	69
FP Translocations				0			0			0			2 extra			0			6 extra			0			10 extra
accuracy				481.886			467.292			140.6			349.217			65.4333			426.567			32.4333			319.133
Insertion1	chr1 21000000 +	chr1 21000000 +											35	167					14	3					8	8
Insertion2	chr2 21000000 +	chr2 21000000 +											20	50					78	12					118	50
Insertion3	chr3 21000000 +	chr3 21000000 +											169	119					7	92					2	22
Insertion4	chr4 21000000 +	chr4 21000000 +											165	54					25	60					2	22
Insertion5	chr5 21000000 +	chr5 21000000 +											138	256					13	14					11	70
Supplementarty table T4. Details of the Hydra simulations. The coordinates of the breakpoints are listed in colomns B and C. Results of 4 simulated datasets are listed in columns (N,O-100 breakpoint read pairs), (K,L-50 breakpoint read pairs), (H,I-20 breakpoint read pairs), (E,F-6 breakpoint read pairs). 6 mate-pair threshold was used to report mate-pair breakpoint clusters
(K,L-6 breakpoint read pairs), (N,O - 6 breakpoint read pairs). The integers represent the distance from the detected breakpoint boundary to the actual breakpoint boundary.
The average accuracy estimates are provided in the "accuracy" row.
