# Supplementary material for: Discovery of recurrent structural variants in nasopharyngeal carcinoma
Source: HighWire-hosted journal article supplement (doi:10.1101/gr.156224.113), 2013-11-08
Supplement: Supp_Table_T6_TC_from_qPCR.xlsx [file Supp_Table_T6_TC_from_qPCR.xlsx]

## Sheet: Sheet1
Well	Sample	CT	average ct	sv-c	control:sv	AAF of SV	% tumor cell with SV
B04	SV1	30.2966	30.2482						Yellow: SV allele specific porduct
B05	SV1	30.3407							Green: control allele product at Left side of BP
B06	SV1	30.1072							Blue: control allele product at Right side of bp
C04	SV1_CL	27.8362	27.8858	2.36237	5.14213	0.16281	0.32562
C05	SV1_CL	28.0311
C06	SV1_CL	27.7901
D04	SV1_CR	28.1062	28.1167	2.13143	4.38151	0.185821	0.371643
D05	SV1_CR	28.1232
D06	SV1_CR	28.1208
B07	SV2	30.608	30.7965
B08	SV2	31.0406
B09	SV2	30.7409
C07	SV2_CL	27.6521	27.6925	3.10404	8.59822	0.104186	0.208372
C08	SV2_CL	27.6801
C09	SV2_CL	27.7452
D07	SV2_CR	29.5397	29.4566	1.33997	2.53146	0.283169	0.566339
D08	SV2_CR	29.4284
D09	SV2_CR	29.4015
B01	SV3	29.9417	29.882
B02	SV3	29.9348
B03	SV3	29.7697
C01	SV3_CL	30.0429	30.0037	-0.121683	0.919115	0.521074	1.04215
C02	SV3_CL	30.0263
C03	SV3_CL	29.942
E01	SV3_CR	29.4221	29.3457	0.536327	1.45028	0.408117	0.816235
E02	SV3_CR	29.308
E03	SV3_CR	29.3071
F01	SV4	30.9642	30.878
F02	SV4	30.8102
F03	SV4	30.8596
G01	SV4_CL	29.2061	28.9808	1.89721	3.72492	0.211644	0.423288
G02	SV4_CL	28.6611
G03	SV4_CL	29.0752
B04	SV5	29.4538	29.7163
B05	SV5	29.8246
B06	SV5	29.8705
C04	SV5_CL	27.9384	28.1415	1.57477	2.97889	0.251327	0.502653
C05	SV5_CL	28.4319
C06	SV5_CL	28.0543
D04	SV5_CR	27.0252	26.9321	2.78425	6.88878	0.126762	0.253525
D05	SV5_CR	27.0023
D06	SV5_CR	26.7687
B07	SV6	29.5783	29.3451
B08	SV6	29.3637
B09	SV6	29.0934
C07	SV6_CL	29.6187	29.4686	-0.123453	0.917988	0.52138	1.04276
C08	SV6_CL	29.1192
C09	SV6_CL	29.6679
D07	SV6_CR	27.7389	27.5514	1.79373	3.4671	0.223859	0.447718
D08	SV6_CR	27.5137
D09	SV6_CR	27.4017
B10	SV7	30.7898	30.7898
C10	SV7_CL	28.3957	28.3957	2.39409	5.25644	0.159835	0.31967
D10	SV7_CR	29.7404	29.7404	1.04938	2.06964	0.325771	0.651541
E04	SV8	30.4859	30.1899
E05	SV8	30.25
E06	SV8	29.8336
F04	SV8_CL	29.6904	29.5927	0.597204	1.51278	0.397965	0.795931
F05	SV8_CL	29.3702
F06	SV8_CL	29.7174
G04	SV8_CR	28.1235	28.1635	2.02634	4.0737	0.197095	0.39419
G05	SV8_CR	28.1262
G06	SV8_CR	28.2408
E07	SV9	28.8627	28.9153
E08	SV9	28.8456
E09	SV9	29.0376
F07	SV9_CL	27.8777	27.8923	1.02306	2.03222	0.329791	0.659582
F08	SV9_CL	27.9404
F09	SV9_CL	27.8587
G07	SV9_CR	27.5369	27.4716	1.44376	2.72029	0.268796	0.537593
G08	SV9_CR	27.4303
G09	SV9_CR	27.4475
E10	SV10	29.4244	29.4244
F10	SV10_CR	27.7325	27.7325	1.69196	3.23095	0.236354	0.472707
D01	N
D02	N
D03	N
G10	N
G11	N
G12	N
Table T6. Tumor content assessment using breakpoint q-PCR. For each breakpoint, we analyzed PCR across the breakpoint, and (typically) two control amplicons (primer design is demonstrated in Fig. S6). qPCR reactions were perfrormed independently for each pair of primers with (typically) three replicate reaction per primer pair. Only tumor tissue DNA was used for this experiment. The results from …
